# Supplementary material for: Exploration and quantification of ascorbate affecting peroxidase-catalyzed chromogenic reactions with a recirculating-flow catalysis detection system
Source: Royal Society of Chemistry journal article supplement (doi:10.1039/d0cc04163g), 2020-01-01
Supplement: d0cc04163g1.pdf [file d0cc04163g1.pdf]

**Electronic Supplementary Information (ESI).**

Table S1. Simultaneous determination result of POD and AsA in plant samples

| Samples<br>(Juice yield / ml g <sup>-1</sup> ) <sup>a</sup> | Dilution | Signals for POD and AsA        |                                       | Reaction solution conc. <sup>b</sup> |                                     | Sample solution conc. <sup>c</sup> |                                     |
|-------------------------------------------------------------|----------|--------------------------------|---------------------------------------|--------------------------------------|-------------------------------------|------------------------------------|-------------------------------------|
|                                                             |          | $k_{\text{POD}} \pm \text{SD}$ | $\Delta A_{\text{AsA}} \pm \text{SD}$ | $E_{\text{POD}} / \text{U L}^{-1}$   | $c_{\text{AsA}} / \text{mg L}^{-1}$ | $E_{\text{POD}} / \text{U L}^{-1}$ | $c_{\text{AsA}} / \text{mg L}^{-1}$ |
| white radishes (0.49)                                       | 5        | 0.871±0.006                    | 0.057±0.001                           | 33.94                                | 2.24                                | 8486.2                             | 59.3                                |
| Chinese cabbage (0.62)                                      | 2        | 0.723±0.024                    | 0.079±0.000                           | 28.21                                | 3.20                                | 2821.3                             | 119.9                               |
| green jujube (0.38)                                         | 1        | 0.209±0.007                    | 0.179±0.002                           | 8.30                                 | 7.44                                | 415.1                              | 372.2                               |

Note: *a.* Juice yield = sample (mL) / sample quality (g);

*b.* Standard curve:  $k_{\text{POD}} = 0.0258E_{\text{POD}} - 0.0047$ ,  $\Delta A_{\text{AsA}} = 0.0236c_{\text{AsA}} + 0.0034$ ;

*c.* Sample content = reaction solution conc. × reaction volume (3mL) / sample volume (0.06mL) × dilution ratio.

Table S2. Recovery tests for AsA and comparison standard curve method (SCM) and standard addition method (SAM)

| samples               | added AsA<br>/ mg L <sup>-1</sup> | $\square A_{\text{AsA}} (\pm \text{SD})$ | $c_{\text{AsA}}^a$<br>/ mg L <sup>-1</sup> | recovery<br>/ % | $c_{\text{AsA}} (\text{SAM})$<br>/ mg L <sup>-1</sup> | RD <sup>b</sup><br>/ % | <i>t</i> -test |
|-----------------------|-----------------------------------|------------------------------------------|--------------------------------------------|-----------------|-------------------------------------------------------|------------------------|----------------|
| white radishes (20%)  | 0                                 | 0.012 (0.001)                            | 18.14                                      | -               | 17.54                                                 | 3.35                   | 0.31           |
|                       | 25                                | 0.024 (0.000)                            | 43.54                                      | 101.59          |                                                       |                        |                |
|                       | 50                                | 0.036 (0.001)                            | 68.43                                      | 100.58          |                                                       |                        |                |
|                       | 75                                | 0.047 (0.001)                            | 91.63                                      | 97.99           |                                                       |                        |                |
|                       | 100                               | 0.058 (0.000)                            | 115.36                                     | 97.22           |                                                       |                        |                |
| Chinese cabbage (50%) | 0                                 | 0.034 (0.001)                            | 65.51                                      | -               | 63.56                                                 | 2.98                   | 0.08           |
|                       | 50                                | 0.058 (0.001)                            | 114.88                                     | 98.74           |                                                       |                        |                |
|                       | 100                               | 0.082 (0.002)                            | 166.31                                     | 100.80          |                                                       |                        |                |
|                       | 150                               | 0.106 (0.001)                            | 217.90                                     | 101.60          |                                                       |                        |                |
|                       | 200                               | 0.128 (0.001)                            | 263.98                                     | 99.24           |                                                       |                        |                |
| green jujube (50%)    | 0                                 | 0.093 (0.001)                            | 190.08                                     | -               | 6.08                                                  | 3.93                   | 0.08           |
|                       | 50                                | 0.116 (0.001)                            | 239.41                                     | 98.65           |                                                       |                        |                |
|                       | 100                               | 0.141 (0.001)                            | 291.10                                     | 101.02          |                                                       |                        |                |
|                       | 200                               | 0.187 (0.001)                            | 389.09                                     | 99.50           |                                                       |                        |                |
|                       | 400                               | 0.278 (0.004)                            | 582.63                                     | 98.14           |                                                       |                        |                |

*a.*  $c_{\text{AsA}} = [(k_{\text{POD}} - 0.0034) / 0.0236] \times \text{reaction volume (3mL)} / \text{sample volume (0.06mL)}$ ;

*b.*  $\text{RD} = | \text{SAM} - \text{SCM} | / \text{SCM} \times 100\%$ .

Table S3. Recovery tests for POD and comparison standard curve method (SCM) and standard addition method (SAM)

| samples              | Added POD<br>/ U L <sup>-1</sup> | $k_{\text{POD}} (\pm \text{SD})$ | $E_{\text{POD}}^a$<br>/U L <sup>-1</sup> | recovery<br>/ % | $E_{\text{POD}} (\text{SAM})$<br>/ U L <sup>-1</sup> | RD <sup>b</sup><br>/ % | <i>t</i> -test |
|----------------------|----------------------------------|----------------------------------|------------------------------------------|-----------------|------------------------------------------------------|------------------------|----------------|
| white radishes (5%)  | 0                                | 0.214 (0.002)                    | 424.76                                   | -               | 416.48                                               | 1.95                   | 0.37           |
|                      | 250                              | 0.347 (0.002)                    | 681.78                                   | 102.81          |                                                      |                        |                |
|                      | 500                              | 0.469 (0.009)                    | 918.02                                   | 98.65           |                                                      |                        |                |
|                      | 750                              | 0.606 (0.002)                    | 1183.62                                  | 101.18          |                                                      |                        |                |
|                      | 1000                             | 0.740 (0.002)                    | 1442.25                                  | 101.75          |                                                      |                        |                |
| Chinese cabbage(20%) | 0                                | 0.279 (0.002)                    | 549.39                                   | -               | 553.15                                               | 0.69                   | 0.42           |
|                      | 250                              | 0.406 (0.001)                    | 796.09                                   | 98.68           |                                                      |                        |                |
|                      | 500                              | 0.529 (0.002)                    | 1034.46                                  | 97.01           |                                                      |                        |                |
|                      | 750                              | 0.666 (0.008)                    | 1298.99                                  | 99.95           |                                                      |                        |                |
|                      | 1000                             | 0.788 (0.003)                    | 1535.37                                  | 98.60           |                                                      |                        |                |
| green jujube (50%)   | 0                                | 0.102 (0.002)                    | 206.78                                   | -               | 211.12                                               | 2.10                   | 0.46           |
|                      | 100                              | 0.154 (0.002)                    | 307.95                                   | 101.17          |                                                      |                        |                |
|                      | 200                              | 0.202 (0.003)                    | 401.36                                   | 97.29           |                                                      |                        |                |
|                      | 300                              | 0.258 (0.003)                    | 509.30                                   | 100.84          |                                                      |                        |                |
|                      | 400                              | 0.304 (0.004)                    | 597.87                                   | 97.77           |                                                      |                        |                |

*a.*  $E_{\text{POD}} = [(k_{\text{POD}} + 0.0047) / 0.0258] \times \text{reaction volume (3mL)} / \text{sample volume (0.06mL)}$ ;

*b.*  $\text{RD} = |\text{SAM} - \text{SCM}| / \text{SCM} \times 100\%$ .

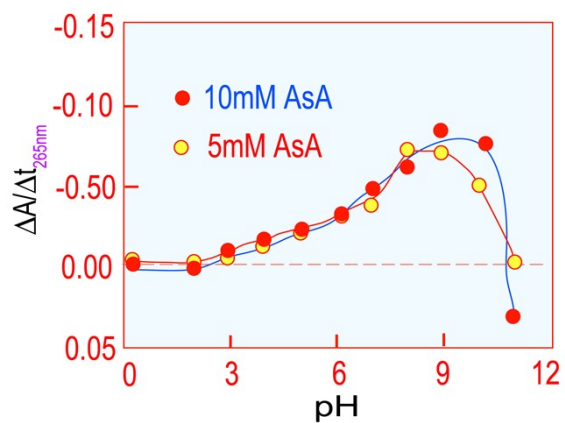

**Fig. S1.** The effect of pH on AsA reduction ability was investigated with the AsA/H<sub>2</sub>O<sub>2</sub> reaction (265 nm). Specific experimental process: Use of 1 M of HCl or NaOH prepared a buffer solution having appropriate pH (0.3~13), and then in 2.975 mL of the buffer solution, 0.025 mL of 5 mmol/L or 10 mmol/L AsA was added to form a reaction solution which was continuously detected for 5 min at the characteristic wavelength (265 nm) of AsA to obtain its absorbance ( $\Delta A/\Delta t$ ).

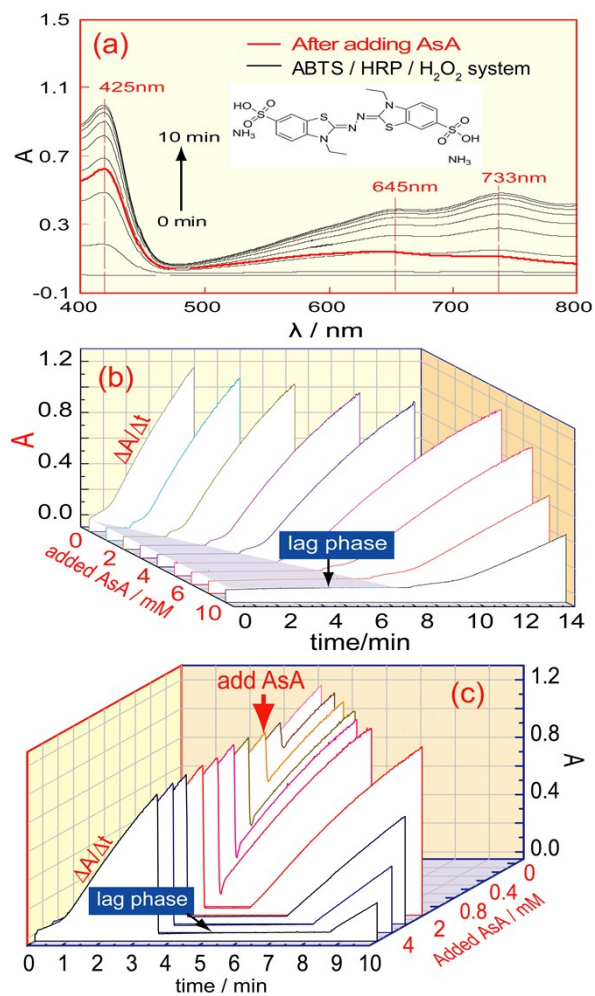

**Fig. S2.** Effects of AsA on the ABTS/POD/H<sub>2</sub>O<sub>2</sub> reaction (425 nm). (a). Spectrum scanning curves; (b). Lag phases of kinetic curves containing different-concentration AsA; (c). The different-concentration AsA was added into the ABTS/POD/H<sub>2</sub>O<sub>2</sub> solution after reacting for 3.5 min.

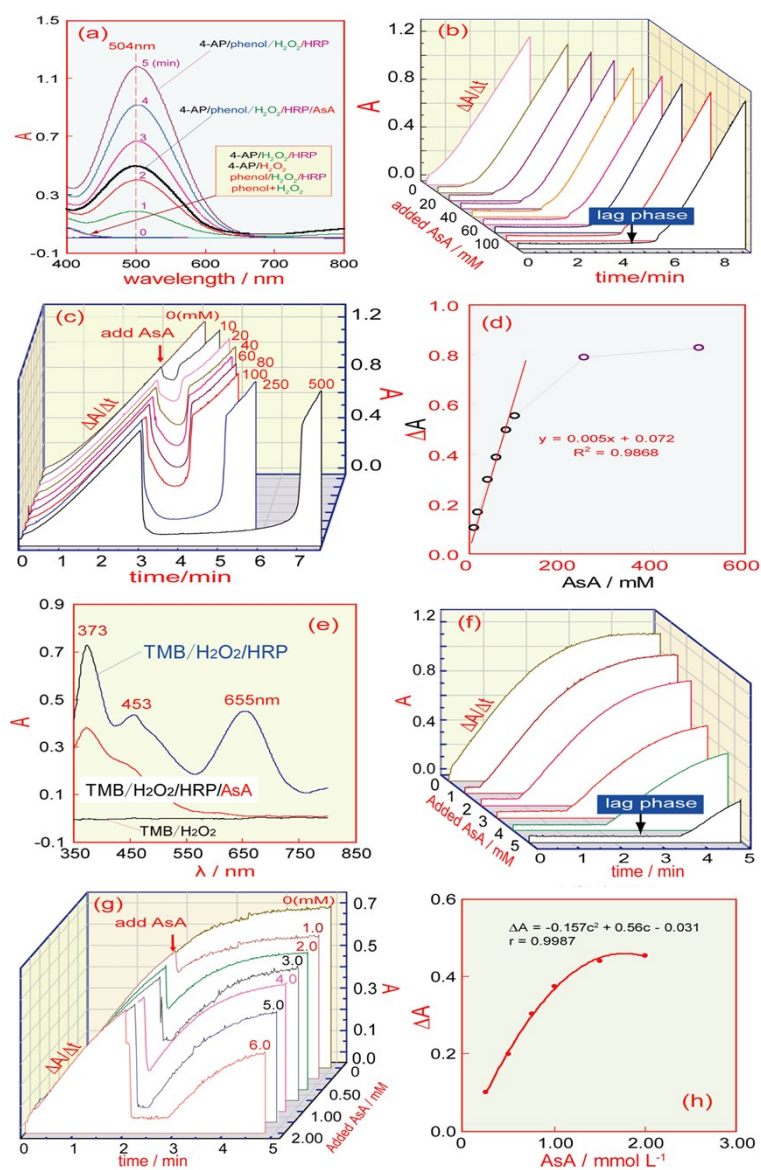

**Fig. S3.** Impacts of AsA on two chromogenic reactions. (a). Scanning curves of 4-AP/phenol/POD/H<sub>2</sub>O<sub>2</sub> mixture; (b). Lag phases of kinetic curves with different-concentration AsA; (c). Different concentrations of AsA were added into 4-AP/phenol/POD/H<sub>2</sub>O<sub>2</sub> reaction after reacting for 3 min; (d). Correlations of extinction degree of chromogenic product with the AsA concentration in 4-AP/phenol/POD/H<sub>2</sub>O<sub>2</sub> reaction; (e). Spectrum scanning of TMB/POD/H<sub>2</sub>O<sub>2</sub> reaction; (f). Lag phases of kinetic curves containing AsA; (g). Adding different concentrations of AsA in TMB/POD/H<sub>2</sub>O<sub>2</sub> mixture after reacting for 2 min; (h). Correlation of the extinction degree of the chromogenic product formed in TMB/POD/H<sub>2</sub>O<sub>2</sub> reaction with the AsA concentration.

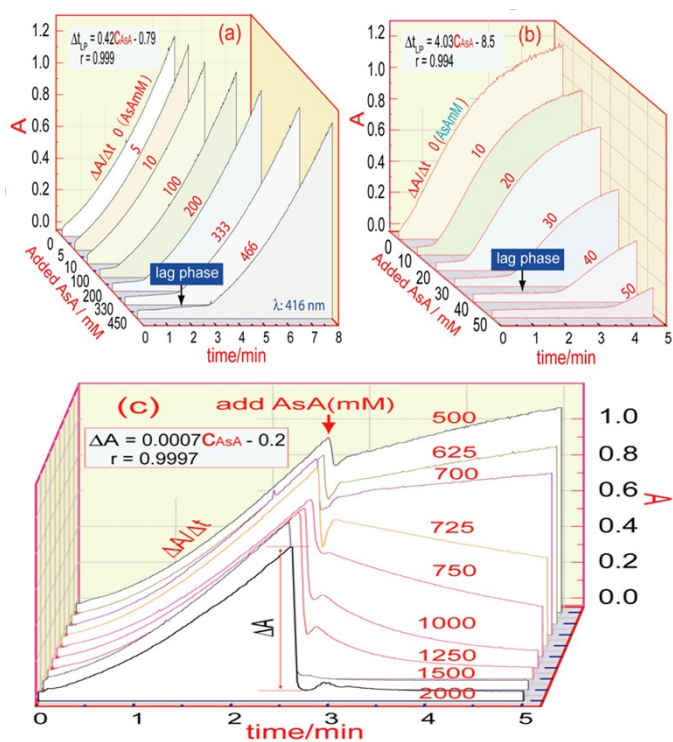

**Fig. S4.** Effects of AsA on other chromogenic reactions for determining POD activity. (a). Lag phases of kinetic curves in the *o*-phenylenediamine/POD/H<sub>2</sub>O<sub>2</sub> reaction which has different concentrations of AsA; (b). Lag phases of kinetic curves in the pyrogallol/POD/H<sub>2</sub>O<sub>2</sub> reaction containing AsA; (c). Lag phases of kinetic curves in the quinol/POD/H<sub>2</sub>O<sub>2</sub> reaction with different-concentration AsA.
